# Supplementary material
Source: publisher figshare collection journal article supplement (https://rs.figshare.com/ndownloader/files/20105288)
Supplement: Supplementary file 1 [file 20105288]

| 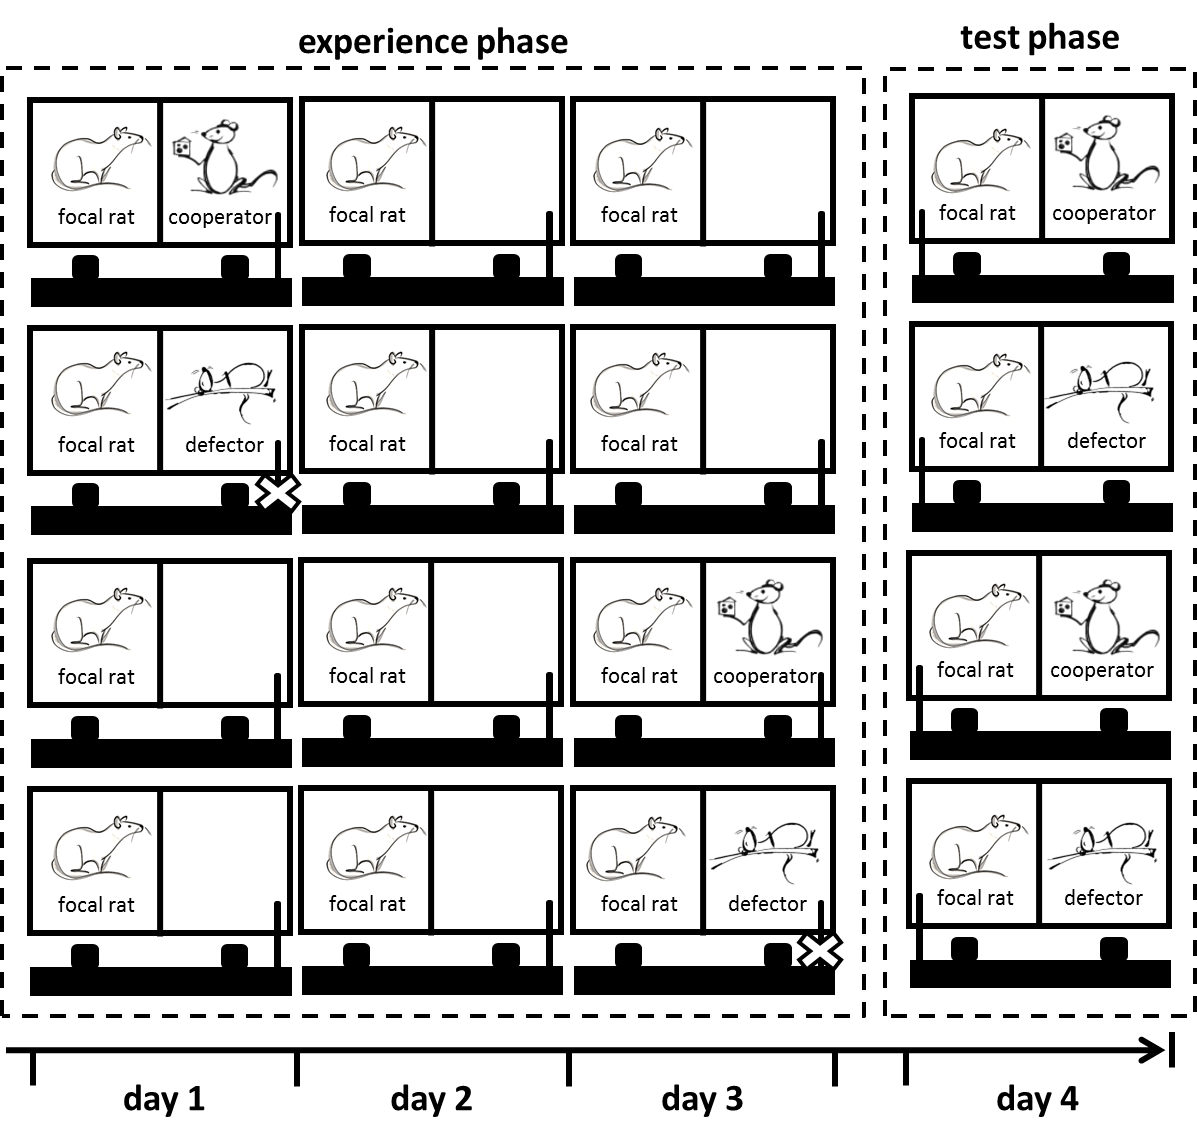 |
| --- |
| **Fig. S1: Experimental setup of the memory capacity test**  Focal rats experienced either cooperating (provided food) or defecting (did not provide food, indicated by a cross across the pulling stick) social partners one or three days prior to the test phase. In the test phase (day 4), focal rats were enabled to provide food to their partners. |
